1 **Infectivity and persistence of influenza viruses in raw milk**

2  
3 **Alessandro Zulli<sup>1\*\*</sup>, Mengyang Zhang<sup>1\*\*</sup>, Sehee Jong<sup>1</sup>, Catherine Blish<sup>2</sup>, Alexandria**  
4 **B. Boehm<sup>1\*</sup>**

5  
6 1. Department of Civil and Environmental Engineering, Stanford University, 473 Via  
7 Ortega, Stanford, California, 94305

8 2. Department of Medicine, Stanford University School of Medicine, Stanford, CA  
9 94305, United States

10  
11 \* Corresponding author: [aboehm@stanford.edu](mailto:aboehm@stanford.edu)

12 \*\* Authors contributed equally to this study

13

14

15 **Abstract**

16

17 Influenza A viruses present a significant public health risk, with recent outbreaks of  
18 highly pathogenic avian influenza (HPAI) H5N1 in dairy cattle raising concerns about  
19 potential transmission through raw milk consumption. This study investigated the  
20 persistence of influenza A virus PR8 (IAV PR8) in raw cow milk at 4 °C. We found that  
21 IAV PR8 remained infectious in raw milk for up to 5 days, with a decay rate constant of -  
22 2.05 day<sup>-1</sup>. In contrast, viral RNA remained detectable and stable for at least 57 days,  
23 with no significant degradation. Pasteurization (63°C for 30 minutes) significantly  
24 reduced detectable viral RNA concentrations, but reduction was less than 1 log. These  
25 findings highlight the potential risk of zoonotic virus transmission through raw milk  
26 consumption and underscore the importance of milk pasteurization. The prolonged  
27 persistence of viral RNA in both raw and pasteurized milk has implications for food  
28 safety assessments and environmental monitoring, particularly in the context of  
29 environmental surveillance for influenza viruses.

30

31 **Keywords: influenza A, milk, persistence, infectivity, avian influenza**

32

33 **Synopsis:** Influenza A RNA is persistent in milk, even after pasteurization, and it  
34 remains infectious for 5 days in refrigerated milk.

35

36

37

## 38 **Introduction**

39

40 Influenza A remains one of the leading causes of mortality and morbidity worldwide,  
41 with the World Health Organization estimating that it causes up to 650,000 deaths and 1  
42 billion cases each year.<sup>1</sup> In the United States, it is responsible for an estimated annual  
43 41 million infections, and 51,000 deaths, infecting approximately 8% of the US  
44 population.<sup>2,3</sup> In addition, it is estimated to be responsible for \$11.2 billion dollars in  
45 economic losses each year within the United States.<sup>4,5</sup>

46

47 Influenza A has demonstrated high rates of mutation and zoonotic potential, making it  
48 difficult to take appropriate preventative measures.<sup>6,7</sup> The zoonotic potential of influenza  
49 A viruses is best demonstrated by the first influenza pandemic of the 21st century, the  
50 2009 H1N1 virus, commonly known as “swine flu”.<sup>8</sup> This outbreak is estimated to have  
51 been responsible for 700 million to 1.4 billion infections in the 2009-2010 season.<sup>9</sup> As its  
52 name implies, genetic analysis of the 2009 H1N1 virus revealed its origin to be  
53 reassortment and subsequent zoonotic transmission from swine to humans.<sup>8,10,11</sup> Highly  
54 pathogenic avian influenza H5N1 (HPAI), has demonstrated similar reassortment and  
55 zoonotic transmission to the 2009 H1N1 virus, and has recently been cause for  
56 significant concern in the United States and worldwide.<sup>7,12</sup> Specifically, H5N1 clade  
57 2.3.4.4 has affected over 100 million poultry since 2022, and, more recently, 194 herds  
58 of cattle, having made the interspecies jump.<sup>13–17</sup> Prior to 2024, H5N1 infection in cows  
59 had not been documented.<sup>15</sup>

60

61 Interestingly, infectious H5N1 is shed into milk of infected, lactating cows.<sup>17</sup> Several  
62 studies have shown pasteurization is effective in inactivating influenza virus in milk,  
63 however, consumption of raw (i.e., unpasteurized) milk is common.<sup>18</sup> The latest United  
64 States Department of Agriculture survey from 2019 reported 4.4% of Americans  
65 consume raw milk at least once a year, and 1.6% (approximately 5 million people)  
66 report consuming raw milk once a month. We reviewed the literature on October 7,  
67 2024 using keywords “influenza raw milk”, “influenza pasteurization” and “infectivity  
68 influenza raw milk”. We identified no studies documented persistence of infective  
69 viruses in raw milk, and limited studies documenting the effect of pasteurization of  
70 influenza A infectivity in raw milk, and two of these have not been peer-reviewed (pre-  
71 prints).<sup>18–20</sup> Given the high consumption of raw milk in the United States, and increasing  
72 trends in outbreaks associated with raw milk consumption, understanding the  
73 persistence of infectious influenza A virus in milk could be particularly useful to better  
74 understanding infection risks associated with this environmental exposure route.<sup>21–23</sup>

75

76 Genetic material of H5N1 has been detected in pasteurized milk products across the  
77 United States.<sup>19,20,24</sup> The presence of H5N1 RNA in milk products has been linked to its  
78 appearance in wastewater in a number of states, and served to alert public health  
79 officials to the potential of nearby infected cattle herds.<sup>14,25</sup> Our literature review  
80 identified no papers examining the effect of pasteurization on influenza A viral RNA in  
81 milk; such information will be useful in advancing the use of wastewater for tracking the  
82 spread of H5N1.<sup>26,27</sup>

83  
84 In this study, we used influenza A H1N1, to assess the persistence of influenza A virus  
85 in raw milk. Our results demonstrate that IAV PR8 remains infectious in raw milk for up  
86 to 5 days at 4 °C, while their genetic material remains detectable in raw milk for 8  
87 weeks, showing little to no degradation at 4 °C. Lastly, the RNA of H1N1 showed  
88 significant degradation after heating at 63 °C for 30 min, which represents the standard  
89 process used for milk pasteurization.

90

## 91 **Methods**

92

### 93 **Virus propagation and purification**

94 IAV PR8 was propagated in Madin Darby canine kidney (MDCK) cells.<sup>28</sup> MDCK cells  
95 (CCL-34, ATCC) were purchased from ATCC and IAV PR8 was kindly provided by Dr.  
96 Jeffrey Glenn. Details of virus propagation are provided in the supporting information  
97 (SI).

98

99 IAV PR8 virus stock was purified and concentrated using ultracentrifugation with 30%  
100 sucrose cushion.<sup>29</sup> Briefly, the crude virus suspension collected from the infected MDCK  
101 cells was centrifuged at 4,000 g for 15 minutes to remove cell debris before  
102 ultracentrifugation. Then 180 mL of the supernatant was processed by  
103 ultracentrifugation with a 30% of sucrose cushion at 112,400 g for 90 minutes at 4 °C.  
104 The IAV PR8 virus pellets were resuspended in 1 mL of PBS buffer and stored at -80 °C  
105 until use.

106

### 107 **Influenza A virus persistence in raw milk**

108 Raw milk was collected from a local dairy farm in California and stored at 4 °C until  
109 persistence experiments (used within 24 hours). Purified IAV PR8 was spiked into the  
110 raw milk at the ratio of 1:10 to achieve final IAV PR8 concentrations of around 10<sup>5</sup>-10<sup>6</sup>  
111 TCID<sub>50</sub>/mL. The mixture of IAV PR8 and raw milk was incubated at 4 °C for 57 days.  
112 The experiment was performed in triplicate. During the incubation period, at day 0, 1, 3  
113 and 5, 60 µL of the sample was withdrawn from each experiment for 50% tissue culture  
114 infectious dose (TCID<sub>50</sub>) assay to measure the concentration of viable IAV PR8 ; at day

115 0, 1, 3, 5, 7, 21, 28, and 35, 60  $\mu\text{L}$  of the sample was withdrawn from each tube for RNA  
116 extraction to measure the concentration of IAV PR8 RNA. TCID<sub>50</sub> assay and RNA  
117 extraction was performed immediately after the samples were withdrawn.

118  
119 The decay rate constant of viable IAV PR8 ( $k_{infectivity}$ ) was estimated by fitting a first-order  
120 decay model to the corresponding virus infectivity data following equation (1):

$$121 \ln\left(\frac{C}{C_0}\right) = \beta_0 + k_{infectivity} t \quad (1)$$

122 where  $C$  is the average concentration of viable IAV PR8 measured at each time point  
123 (TCID<sub>50</sub> mL<sup>-1</sup>);  $C_0$  is the initial concentration of viable IAV PR8 measured at day 0  
124 (TCID<sub>50</sub> mL<sup>-1</sup>);  $\beta_0$  is the intercept;  $k_{infectivity}$  is the first-order decay rate constant for viable  
125 IAV PR8 (day<sup>-1</sup>);  $t$  is the incubation time (day).

126  
127 The decay rate constant of IAV PR8 RNA ( $k_{RNA}$ ) was estimated by fitting a first-order  
128 decay model to the corresponding viral RNA data following equation (2):

$$129 \ln\left(\frac{N}{N_0}\right) = \beta_1 + k_{RNA} t \quad (2)$$

130 where  $N$  is the average concentration of IAV PR8 RNA measured at each time point  
131 (gene copies mL<sup>-1</sup>);  $N_0$  is the initial concentration of IAV PR8 RNA measured at day 0  
132 (gene copies mL<sup>-1</sup>);  $\beta_1$  is the intercept;  $k_{RNA}$  is the first-order decay rate constant for IAV  
133 PR8 RNA (day<sup>-1</sup>);  $t$  is the incubation time (day).

134  
135  $k_{infectivity}$  and  $k_{RNA}$ , as well as their standard error, were determined using the function  
136 “lm” in R (version 4.2.2) and Rstudio (Version 2022.12.0+353), and the goodness of fit  
137 of the first-order decay models was assessed through examination of the coefficient of  
138 determination ( $R^2$ ).

139  
140 **Pasteurization experiment.** Pasteurization process is designed to inactivate the  
141 pathogens in food products and one of the most common methods used for milk  
142 pasteurization is heating the milk to 63 °C for at least 30 minutes.<sup>18</sup> In this study, the raw  
143 milk spiked with IAV PR8 was heat in a water bath at 63 °C for 30 minutes to mimic the  
144 milk pasteurization process. Three independent tubes were used as experimental  
145 triplicates. 60  $\mu\text{L}$  of sample was collected before and after heating and proceeded to  
146 RNA extraction immediately. The degradation of IAV PR8 RNA during the  
147 pasteurization process was determined by comparing the IAV PR8 RNA concentration  
148 before and after treatment.

149  
150 **TCID<sub>50</sub> for virus titration.** TCID<sub>50</sub> assay quantifies the viable virus by determining the  
151 highest dilution of the sample that can cause 50% infection in cell culture.

152

153 **Nucleic acid extraction.** Extraction was performed using a ZymoBIOMICS DNA/RNA  
154 miniprep kit (#R2002, Zymo Research). Sixty microliters of milk sample were collected  
155 from the 3 replicates at each timepoint and combined with 750  $\mu$ L of DNA/RNA shield  
156 (#R1100-250, Zymo Research). Samples were lysed through agitation on a Vortex  
157 Genie 2 at maximum speed for 15 minutes (#SI-0236, Scientific Industries). Negative  
158 extraction controls were included consisting of 750  $\mu$ L of DNA/RNA shield and 60  $\mu$ L of  
159 ultrapure water and extraction of 60  $\mu$ L of raw milk which did not have spiked influenza.  
160 Positive controls were included by extracting 10  $\mu$ L of IAV PR8 stock. Total nucleic acid  
161 purification was then performed and samples were eluted into 100  $\mu$ L of DNase/RNase  
162 free water. Nucleic acid quality and concentration were assessed through  
163 spectrophotometry (#ND-1000, ThermoScientific).

164  
165 **Viral quantification.** Viral RNA quantification was performed using singleplex reverse  
166 transcription digital droplet polymerase chain reaction (RT-ddPCR) using an AutoDG  
167 Automated Droplet Generator (Bio-Rad, Hercules, CA), Bio-Rad C1000 Touch Thermal  
168 (Bio-Rad) thermocycler, and a QX200 Droplet Reader (Bio-Rad). An influenza A  
169 primer/probe set targeting the M1 gene was used, consisting of CAA GAC CAA TCY  
170 TGT CAC CTC TGA C for forward primer, GCA TTY TGG ACA AAV CGT CTA CG for  
171 reverse primer, and 5'-/FAM/TGC AGT CCT /ZEN/ CGC TCA CTG GGC  
172 ACG/3IABkFQ/-3 for the probe. The probe used a FAM, 6- fluorescein amidite as the  
173 fluorescent molecule with an internal ZEN quencher (proprietary from IDT) and a 3' Iowa  
174 Black FQ quencher.<sup>30</sup> Neat cultured Influenza A PR8 was used as a positive control to  
175 validate assay performance, and no template controls were included in all runs. All  
176 extracts were diluted 100x before quantification to avoid detector saturation. Each of the  
177 triplicate extractions were run in individual wells. Thresholds on the FAM channel were  
178 set at 2,700 relative fluorescence units (RFU). Though no plates failed QA/QC, in the  
179 case of a plate failing QA/QC (i.e., positive controls and negative controls not positive  
180 and negative, respectively), we would have reported the reason for the failure and noted  
181 the re-run of any samples. Thermocycling conditions were as follows: reverse  
182 transcription at 50°C for 60 minutes, enzyme activation at 95°C for 5 minutes, 40 cycles  
183 of denaturation at 95°C for 30 seconds and annealing and extension at 61°C for 30  
184 seconds, enzyme deactivation at 98°C for 10 minutes then an indefinite hold at 4°C.

## 185 **Results and discussion**

186  
187 **Persistence of influenza A viral infectivity in raw milk.** The persistence of influenza  
188 viruses in raw milk was evaluated by monitoring the infectivity of IAV PR8 incubated  
189 with raw cow milk, collected from a dairy farm, at 4°C for up to 5 days. As shown in  
190 **Figure 1**, IAV PR8 decayed to below 5.0 TCID<sub>50</sub> mL<sup>-1</sup> after 5 days in raw milk at 4°C,

191 with an initial concentration of approximately  $4.98 \times 10^5$  TCID<sub>50</sub> mL<sup>-1</sup>. The decay rate  
192 constant  $k_{infectivity}$  was estimated by fitting a first-order decay model and was  $-2.05 \pm$   
193  $0.45$  day<sup>-1</sup> (estimated value  $\pm$  standard error,  $p < 0.05$ ,  $R^2 = 0.865$ ). This value is greater  
194 compared to those found for influenza A virus decay in other aqueous matrices; a  
195 systematic review of enveloped virus decay in water found mean influenza virus decay  
196 to be  $-0.3$  day<sup>-1</sup> across all tested conditions ( $n = 560$ ).<sup>31</sup>

197  
198 The persistence of influenza viruses in raw milk causes concern, as the consumption of  
199 raw milk remains high in the United States due to cultural factors and several popular  
200 misconceptions.<sup>22,32</sup> Some of these misconceptions include beliefs that raw milk could  
201 cure lactose intolerance or asthma, enhance the immune system, and have greater  
202 nutritional value compared to pasteurized milk.<sup>33–36</sup> Hundreds of outbreaks and deaths  
203 have occurred because of the pathogens contained in raw milk.<sup>23</sup> Previously, only  
204 bacteria were reported in raw milk-associated disease outbreaks including  
205 campylobacteriosis, salmonellosis, tuberculosis, and *Escherichia coli* 0157:H7  
206 infection.<sup>21,37–39</sup> The results of this study show influenza A virus may remain infectious in  
207 raw milk for a prolonged period of time under refrigerated conditions, representing an  
208 potential exposure route.

209  
210 Highly pathogenic avian influenza H5N1 clade 2.3.4.4b (HPAI) has been a cause for  
211 concern worldwide due to its newly observed ability to infect dairy cattle herds  
212 throughout the United States, with 243 herds in 14 states affected as of October 6,  
213 2024.<sup>15,40–42</sup> HPAI H5N1 also has a propensity to replicate in the mammary gland of  
214 dairy cattle, due to the high expression of HPAI H5N1 receptors, ultimately resulting in  
215 the shedding of HPAI H5N1 in the milk.<sup>17</sup> Mammal-to-mammal transmission has been  
216 observed in the form of cats ingesting raw milk on dairy farms, and subsequently being  
217 infected with HPAI, further supporting that HPAI H5N1 can be shed into milk.<sup>43</sup> Le Sage  
218 et al. reported that influenza H5N1 and H1N1 remained infectious in unpasteurized milk  
219 on stainless steel and rubber surfaces for up to 5 hours.<sup>20</sup> The data presented here  
220 significantly contributes to existing knowledge by demonstrating that influenza A can  
221 remain infectious in raw milk for up to 5 days at 4°C. This shows that there could be  
222 significant risk of inter-species transmission of the virus due to environmental spillage of  
223 milk. The recommended shelf life of raw milk under refrigeration is 7-10 days.<sup>44</sup> Based  
224 on our results, it took 2.3 days to achieve 99% reduction in infectivity (T99) of IAV PR8  
225 in raw cow milk (Figure S1).

226  
227 One limitation of this study is that we measured the decay of exogenous human IAV  
228 spiked into raw cow milk. The decay of endogenous HPAI H5N1 in the milk from HPAI  
229 H5N1-infected dairy cattle could potentially be affected by presence of antibodies in  
230 milk. It is known that the influenza-specific antibodies in human breast milk can provide

231 protective immunological properties for the infants and play an essential role in  
232 increasing resistance of infants to influenza virus infection.<sup>45</sup> However, little is known  
233 about the impact of antibodies present in milk on the persistence of influenza viruses  
234 shed in milk, which call for further research.

235  
236 **Persistence of influenza A viral RNA in raw milk.** IAV PR8 nucleic acids remained  
237 detectable and stable for 57 days in raw milk at 4°C (Figure 1). The calculated decay  
238 rate constant  $k_{RNA}$  is -0.00049 ( $p=0.709$ ). This value is not significantly different from 0.  
239 Further, we took samples from time point 0 and pasteurized them as described above.  
240 The resulting pasteurized milk samples were extracted and IAV RNA quantified using  
241 the same protocol as the raw milk. The resulting ddPCR concentrations showed a  
242 significant reduction from an average of  $2.9 * 10^8$  copies/mL in the raw milk samples to  
243  $9.1 * 10^7$  copies/mL in the pasteurized milk samples, a decrease of 70% (Fig 2,  $p<0.01$ ,  
244 Welch's t-test).

245  
246 HPAI has been extensively detected in wastewater streams across the United States,  
247 and the source of these detections was determined to most likely have occurred due to  
248 industrial discharge from local milk processing facilities.<sup>27,46</sup> However, inputs from  
249 residential or commercial discarded milk are also possible sources.<sup>46</sup> It is estimated that  
250 17 kg of milk and dairy products are discarded per capita per year by consumers,  
251 translating to 15,500 tons per day.<sup>47</sup> Given our findings of the stability of influenza A  
252 RNA in milk, residential or commercial milk discarded through drains could represent a  
253 source of H5N1 RNA in wastewater. This high level of stability potentially indicates that  
254 environmental spillage of milk could also lead to detections within the environment.

255  
256 Our study has significant implications for both environmental and food safety. The  
257 extremely prolonged persistence of IAV PR8 RNA in raw milk, compared to that of virus  
258 infectivity, may complicate efforts to assess the safety of raw milk and other dairy  
259 products. This is because the detection of viral genomic materials, a detection method  
260 that is rapid and relatively easy to implement, may not necessarily indicate the presence  
261 of viable viruses. Pasteurization has been shown to successfully inactivate influenza  
262 viruses, including HPAI, in milk.<sup>24</sup> However, HPAI has been consistently detected  
263 through molecular biology methods in pasteurized milk from affected cattle herds,<sup>48</sup>  
264 which could be explained by the high resistance of IAV RNA to pasteurization reported  
265 herein. Moreover, source tracking might be essential when interpreting wastewater  
266 surveillance data for influenza viruses; industrial discharges may be a source of H5N1,  
267 but so could household or commercial milk discarding, and also potentially inputs from  
268 other sources including infected humans or birds.<sup>27</sup>

269

270 Overall, our study demonstrates that influenza viruses remain infectious in raw milk for  
271 up to 5 days, which could pose a significant human health risk, and concentrations  
272 measured through molecular biology methods remain constant for at least 57 days. The  
273 results presented here will help both public health officials understand the risks of raw  
274 milk consumption, and provide context for environmental scientists and engineers  
275 working in the environmental detection of influenza. It is important to note that this study  
276 used H1N1 influenza A subtype because H5N1 is a select agent and working with it in a  
277 laboratory requires extensive safety protocols and certifications. Results of experiments  
278 using other subtypes could vary. However, a systematic review of the literature on  
279 influenza A decay in water suggested that decay of most subtypes was similar in that  
280 matrix.<sup>31</sup>  
281  
282

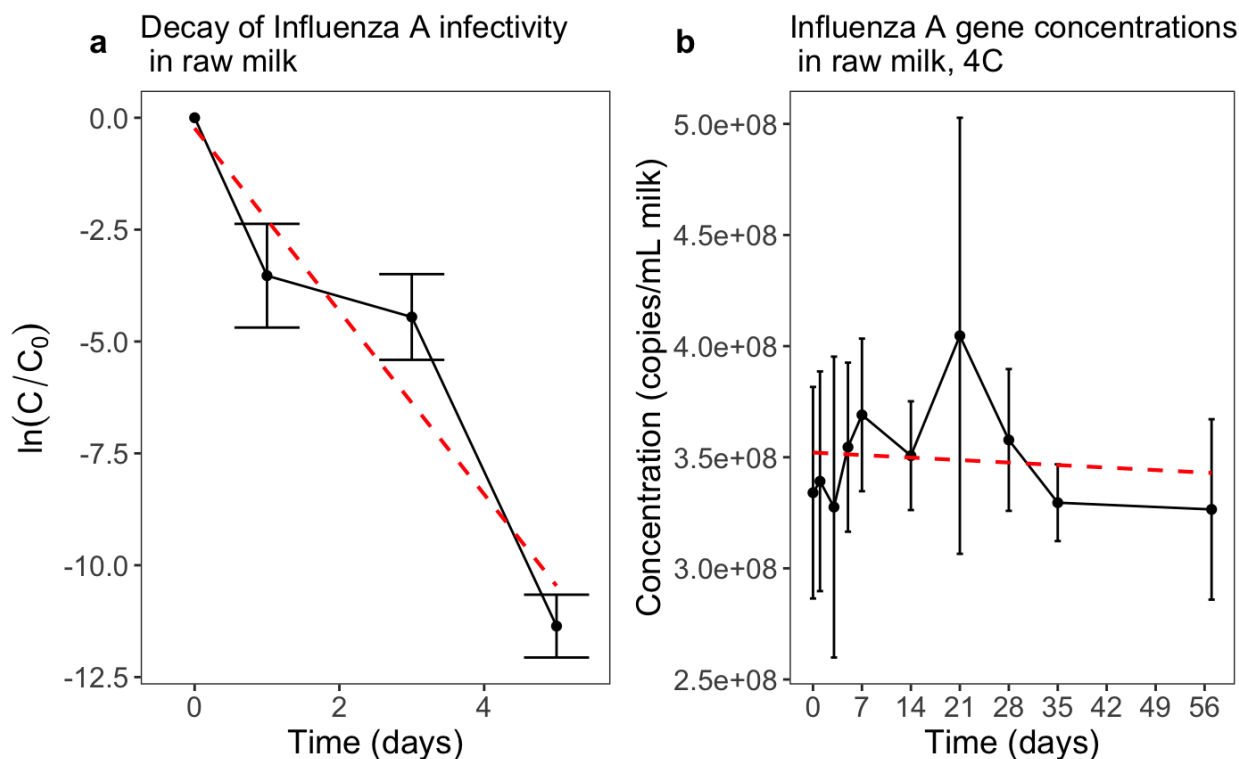

283  
284 Figure 1. Decay of infectivity of IAV PR8 as measured by the natural logarithm of the  
285 fraction of viable IAV PR8 compared to initial time point assessed by TCID<sub>50</sub> in raw milk  
286 at 4°C (1a), and decay of IAV PR8 genome copies in raw milk at 4°C (1b). The red  
287 dashed lines represent linear regression used to calculate decay rate constants. Error  
288 bars represent standard deviation based on 3 experimental replicates.  
289



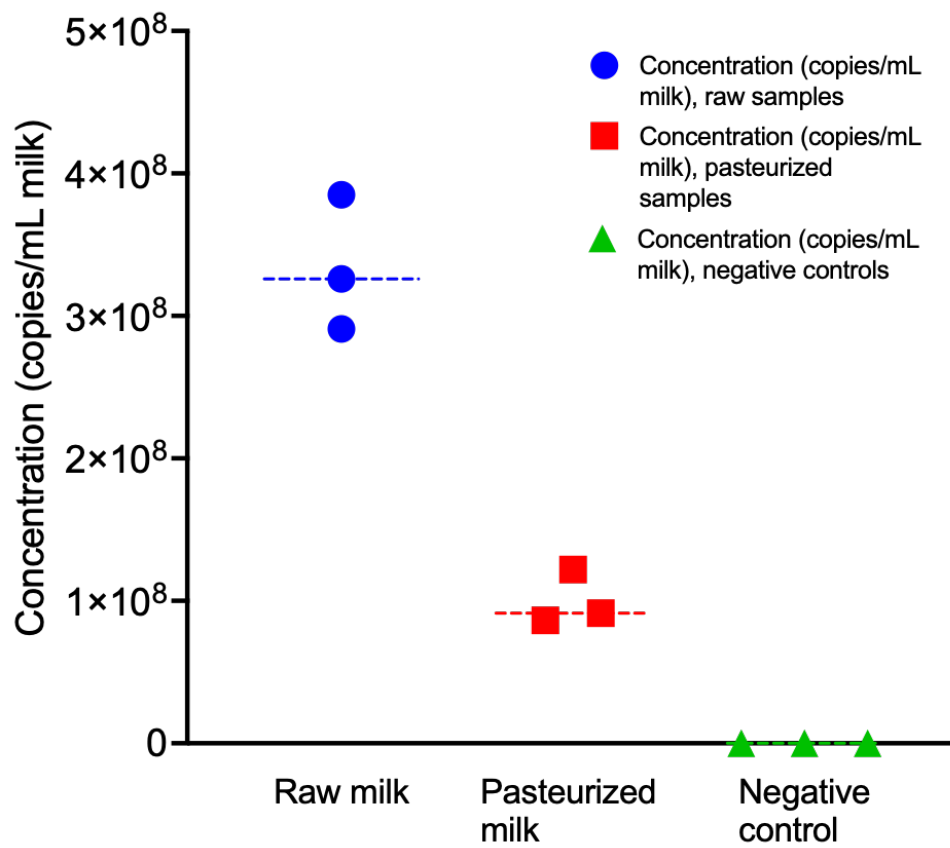

290  
291 Figure 2. Measured concentrations (in gene copies per ml of milk) of influenza in raw  
292 milk samples (blue), pasteurized samples (red), and negative no template controls  
293 (green). The horizontal dashed lines represent the mean of the data points. All negative  
294 controls were found to be negative.  
295

296

297 References

298

- 299 (1) *Influenza (Seasonal)*. [https://www.who.int/news-room/fact-sheets/detail/influenza-](https://www.who.int/news-room/fact-sheets/detail/influenza-(seasonal))  
300 (seasonal) (accessed 2024-08-30).
- 301 (2) CDC. *About Estimated Flu Burden*. Flu Burden. [https://www.cdc.gov/flu-](https://www.cdc.gov/flu-burden/php/about/index.html)  
302 burden/php/about/index.html (accessed 2024-08-30).
- 303 (3) Tokars, J. I.; Olsen, S. J.; Reed, C. Seasonal Incidence of Symptomatic Influenza in the  
304 United States. *Clin. Infect. Dis.* **2018**, *66* (10), 1511–1518.  
305 <https://doi.org/10.1093/cid/cix1060>.
- 306 (4) Molinari, N.-A. M.; Ortega-Sanchez, I. R.; Messonnier, M. L.; Thompson, W. W.; Wortley,  
307 P. M.; Weintraub, E.; Bridges, C. B. The Annual Impact of Seasonal Influenza in the US:  
308 Measuring Disease Burden and Costs. *Vaccine* **2007**, *25* (27), 5086–5096.  
309 <https://doi.org/10.1016/j.vaccine.2007.03.046>.
- 310 (5) Putri, W. C. W. S.; Muscatello, D. J.; Stockwell, M. S.; Newall, A. T. Economic Burden of  
311 Seasonal Influenza in the United States. *Vaccine* **2018**, *36* (27), 3960–3966.  
312 <https://doi.org/10.1016/j.vaccine.2018.05.057>.
- 313 (6) Nobusawa, E.; Sato, K. Comparison of the Mutation Rates of Human Influenza A and B  
314 Viruses. *J. Virol.* **2006**, *80* (7), 3675–3678. [https://doi.org/10.1128/JVI.80.7.3675-](https://doi.org/10.1128/JVI.80.7.3675-3678.2006)  
315 3678.2006.
- 316 (7) Alexander, D. J. An Overview of the Epidemiology of Avian Influenza. *Vaccine* **2007**, *25*  
317 (30), 5637–5644. <https://doi.org/10.1016/j.vaccine.2006.10.051>.
- 318 (8) Al, H. S.; McIntosh, K. The First Influenza Pandemic of the 21st Century. *Ann. Saudi Med.*  
319 **2010**, *30* (1), 1–10. <https://doi.org/10.4103/0256-4947.59365>.
- 320 (9) Kelly, H.; Peck, H. A.; Laurie, K. L.; Wu, P.; Nishiura, H.; Cowling, B. J. The Age-Specific  
321 Cumulative Incidence of Infection with Pandemic Influenza H1N1 2009 Was Similar in  
322 Various Countries Prior to Vaccination. *PLOS ONE* **2011**, *6* (8), e21828.  
323 <https://doi.org/10.1371/journal.pone.0021828>.
- 324 (10) Novel Swine-Origin Influenza A (H1N1) Virus Investigation Team. Emergence of a Novel  
325 Swine-Origin Influenza A (H1N1) Virus in Humans. *N. Engl. J. Med.* **2009**, *360* (25), 2605–  
326 2615. <https://doi.org/10.1056/NEJMoa0903810>.
- 327 (11) Zhang, H.; Chen, L. Possible Origin of Current Influenza A H1N1 Viruses. *Lancet Infect.*  
328 *Dis.* **2009**, *9* (8), 456–457. [https://doi.org/10.1016/S1473-3099\(09\)70181-1](https://doi.org/10.1016/S1473-3099(09)70181-1).
- 329 (12) Itoh, Y.; Shinya, K.; Kiso, M.; Watanabe, T.; Sakoda, Y.; Hatta, M.; Muramoto, Y.; Tamura,  
330 D.; Sakai-Tagawa, Y.; Noda, T.; Sakabe, S.; Imai, M.; Hatta, Y.; Watanabe, S.; Li, C.;  
331 Yamada, S.; Fujii, K.; Murakami, S.; Imai, H.; Kakugawa, S.; Ito, M.; Takano, R.; Iwatsuki-  
332 Horimoto, K.; Shimojima, M.; Horimoto, T.; Goto, H.; Takahashi, K.; Makino, A.; Ishigaki,  
333 H.; Nakayama, M.; Okamatsu, M.; Takahashi, K.; Warshauer, D.; Shult, P. A.; Saito, R.;  
334 Suzuki, H.; Furuta, Y.; Yamashita, M.; Mitamura, K.; Nakano, K.; Nakamura, M.;  
335 Brockman-Schneider, R.; Mitamura, H.; Yamazaki, M.; Sugaya, N.; Suresh, M.; Ozawa,  
336 M.; Neumann, G.; Gern, J.; Kida, H.; Ogasawara, K.; Kawaoka, Y. In Vitro and in Vivo  
337 Characterization of New Swine-Origin H1N1 Influenza Viruses. *Nature* **2009**, *460* (7258),  
338 1021–1025. <https://doi.org/10.1038/nature08260>.
- 339 (13) CDC. *USDA Reported H5N1 Bird Flu Detections in US Backyard and Commercial Poultry*.  
340 Avian Influenza (Bird Flu). [https://www.cdc.gov/bird-flu/situation-summary/data-map-](https://www.cdc.gov/bird-flu/situation-summary/data-map-commercial.html)  
341 commercial.html (accessed 2024-08-30).
- 342 (14) *HPAI Confirmed Cases in Livestock | Animal and Plant Health Inspection Service*.  
343 <https://www.aphis.usda.gov/livestock-poultry-disease/avian/avian-influenza/hpai->

- 344 detections/hpai-confirmed-cases-livestock (accessed 2024-08-30).
- 345 (15) Neumann, G.; Kawaoka, Y. Highly Pathogenic H5N1 Avian Influenza Virus Outbreak in  
346 Cattle: The Knowns and Unknowns. *Nat. Rev. Microbiol.* **2024**, *22* (9), 525–526.  
347 <https://doi.org/10.1038/s41579-024-01087-1>.
- 348 (16) Uyeki, T. M.; Milton, S.; Hamid, C. A.; Webb, C. R.; Presley, S. M.; Shetty, V.; Rollo, S. N.;  
349 Martinez, D. L.; Rai, S.; Gonzales, E. R.; Kniss, K. L.; Jang, Y.; Frederick, J. C.; Cruz, J. A.  
350 D. L.; Liddell, J.; Di, H.; Kirby, M. K.; Barnes, J. R.; Davis, C. T. Highly Pathogenic Avian  
351 Influenza A(H5N1) Virus Infection in a Dairy Farm Worker. *N. Engl. J. Med.* **2024**, *390* (21),  
352 2028–2029. <https://doi.org/10.1056/NEJMc2405371>.
- 353 (17) Nelli, R. K.; Harm, T. A.; Siepker, C.; Groeltz-Thrush, J. M.; Jones, B.; Twu, N.-C.;  
354 Nenninger, A. S.; Magstadt, D. R.; Burrough, E. R.; Piñeyro, P. E.; Mainenti, M.;  
355 Carnaccini, S.; Plummer, P. J.; Bell, T. M. Sialic Acid Receptor Specificity in Mammary  
356 Gland of Dairy Cattle Infected with Highly Pathogenic Avian Influenza A(H5N1) Virus.  
357 *Emerg. Infect. Dis.* **2024**, *30* (7), 1361–1373. <https://doi.org/10.3201/eid3007.240689>.
- 358 (18) Alkie, T.; Naseri, N.; Romero-Barrios, P.; Catford, A.; Krishnan, J.; Pama, L.; Hooper-  
359 McGrevy, K.; Nfon, C.; Cutts, T.; Berhane, Y. Effectiveness of Pasteurization for the  
360 Inactivation of H5N1 Influenza Virus in Raw Whole Milk. medRxiv July 24, 2024, p  
361 2024.07.23.24310825. <https://doi.org/10.1101/2024.07.23.24310825>.
- 362 (19) Guan, L.; Einfeld, A. J.; Pattinson, D.; Gu, C.; Biswas, A.; Maemura, T.; Trifkovic, S.;  
363 Babujee, L.; Presler, R.; Dahn, R.; Halfmann, P. J.; Barnhardt, T.; Neumann, G.;  
364 Thompson, A.; Swinford, A. K.; Dimitrov, K. M.; Poulsen, K.; Kawaoka, Y. Cow's Milk  
365 Containing Avian Influenza A(H5N1) Virus — Heat Inactivation and Infectivity in Mice. *N.*  
366 *Engl. J. Med.* **2024**, *391* (1), 87–90. <https://doi.org/10.1056/NEJMc2405495>.
- 367 (20) Le Sage, V.; Campbell, A. J.; Reed, D. S.; Duprex, W. P.; Lakdawala, S. S. Influenza  
368 H5N1 and H1N1 Viruses Remain Infectious in Unpasteurized Milk on Milking Machinery  
369 Surfaces. *medRxiv* **2024**, 2024.05.22.24307745.  
370 <https://doi.org/10.1101/2024.05.22.24307745>.
- 371 (21) Headrick, M. L.; Korangy, S.; Bean, N. H.; Angulo, F. J.; Altekruze, S. F.; Potter, M. E.;  
372 Klontz, K. C. The Epidemiology of Raw Milk-Associated Foodborne Disease Outbreaks  
373 Reported in the United States, 1973 through 1992. *Am. J. Public Health* **1998**, *88* (8),  
374 1219–1221. <https://doi.org/10.2105/AJPH.88.8.1219>.
- 375 (22) LANDO, A. M.; BAZACO, M. C.; PARKER, C. C.; FERGUSON, M. Characteristics of U.S.  
376 Consumers Reporting Past Year Intake of Raw (Unpasteurized) Milk: Results from the  
377 2016 Food Safety Survey and 2019 Food Safety and Nutrition Survey. *J. Food Prot.* **2022**,  
378 *85* (7), 1036–1043. <https://doi.org/10.4315/JFP-21-407>.
- 379 (23) Program, H. F. The Dangers of Raw Milk: Unpasteurized Milk Can Pose a Serious Health  
380 Risk. *FDA* **2024**.
- 381 (24) Caceres, C. J.; Gay, L. C.; Faccin, F. C.; Regmi, D.; Palomares, R.; Perez, D. R. Early  
382 Release - Influenza A(H5N1) Virus Resilience in Milk after Thermal Inactivation - Volume  
383 30, Number 11—November 2024 - Emerging Infectious Diseases Journal - CDC.  
384 <https://doi.org/10.3201/eid3011.240772>.
- 385 (25) Nutrition, C. for F. S. and A. Updates on Highly Pathogenic Avian Influenza (HPAI). *FDA*  
386 **2024**.
- 387 (26) Louis, S. Wastewater Surveillance for Influenza A Virus and H5 Subtype Concurrent with  
388 the Highly Pathogenic Avian Influenza A(H5N1) Virus Outbreak in Cattle and Poultry and  
389 Associated Human Cases — United States, May 12–July 13, 2024. *MMWR Morb. Mortal.*  
390 *Wkly. Rep.* **2024**, *73*. <https://doi.org/10.15585/mmwr.mm7337a1>.
- 391 (27) Wolfe, M. K.; Duong, D.; Shelden, B.; Chan, E. M. G.; Chan-Herur, V.; Hilton, S.; Paulos,  
392 A. H.; Xu, X.-R. S.; Zulli, A.; White, B. J.; Boehm, A. B. Detection of Hemagglutinin H5  
393 Influenza A Virus Sequence in Municipal Wastewater Solids at Wastewater Treatment  
394 Plants with Increases in Influenza A in Spring, 2024. *Environ. Sci. Technol. Lett.* **2024**, *11*

- 395 (6), 526–532. <https://doi.org/10.1021/acs.estlett.4c00331>.
- 396 (28) Balish, A. L.; Katz, J. M.; Klimov, A. I. Influenza: Propagation, Quantification, and Storage.
- 397 *Curr. Protoc. Microbiol.* **2013**, 29 (1), 15G.1.1-15G.1.24.
- 398 <https://doi.org/10.1002/9780471729259.mc15g01s29>.
- 399 (29) David, S. C.; Schaub, A.; Terrettaz, C.; Motos, G.; Costa, L. J.; Nolan, D. S.; Augugliaro,
- 400 M.; Wynn, H. K.; Glas, I.; Pohl, M. O.; Klein, L. K.; Luo, B.; Bluvshstein, N.; Violaki, K.;
- 401 Hugentobler, W.; Krieger, U. K.; Peter, T.; Stertz, S.; Nenes, A.; Kohn, T. Stability of
- 402 Influenza A Virus in Droplets and Aerosols Is Heightened by the Presence of Commensal
- 403 Respiratory Bacteria. *J. Virol.* **2024**, 98 (7), e00409-24. [https://doi.org/10.1128/jvi.00409-](https://doi.org/10.1128/jvi.00409-24)
- 404 [24](https://doi.org/10.1128/jvi.00409-24).
- 405 (30) Wolfe, M. K.; Duong, D.; Bakker, K. M.; Ammerman, M.; Mortenson, L.; Hughes, B.; Arts,
- 406 P.; Luring, A. S.; Fitzsimmons, W. J.; Bendall, E.; Hwang, C. E.; Martin, E. T.; White, B.
- 407 J.; Boehm, A. B.; Wigginton, K. R. Wastewater-Based Detection of Two Influenza
- 408 Outbreaks. *Environ. Sci. Technol. Lett.* **2022**, 9 (8), 687–692.
- 409 <https://doi.org/10.1021/acs.estlett.2c00350>.
- 410 (31) Silverman, A. I.; Boehm, A. B. Systematic Review and Meta-Analysis of the Persistence of
- 411 Enveloped Viruses in Environmental Waters and Wastewater in the Absence of
- 412 Disinfectants. *Environ. Sci. Technol.* **2021**, 55 (21), 14480–14493.
- 413 <https://doi.org/10.1021/acs.est.1c03977>.
- 414 (32) Program, H. F. Raw Milk Misconceptions and the Danger of Raw Milk Consumption. *FDA*
- 415 **2024**.
- 416 (33) Lin, M. Y.; Savaiano, D.; Harlander, S. Influence of Nonfermented Dairy Products
- 417 Containing Bacterial Starter Cultures on Lactose Maldigestion in Humans. *J. Dairy Sci.*
- 418 **1991**, 74 (1), 87–95. [https://doi.org/10.3168/jds.S0022-0302\(91\)78147-2](https://doi.org/10.3168/jds.S0022-0302(91)78147-2).
- 419 (34) Waser, M.; Michels, K. B.; Bieli, C.; Flöistrup, H.; Pershagen, G.; von Mutius, E.; Ege, M.;
- 420 Riedler, J.; Schram-Bijkerk, D.; Brunekreef, B.; van Hage, M.; Lauener, R.; Braun-
- 421 Fahrländer, C.; PARSIFAL Study team. Inverse Association of Farm Milk Consumption
- 422 with Asthma and Allergy in Rural and Suburban Populations across Europe. *Clin. Exp.*
- 423 *Allergy J. Br. Soc. Allergy Clin. Immunol.* **2007**, 37 (5), 661–670.
- 424 <https://doi.org/10.1111/j.1365-2222.2006.02640.x>.
- 425 (35) Michalski, M.-C.; Januel, C. Does Homogenization Affect the Human Health Properties of
- 426 Cow's Milk? *Trends Food Sci. Technol.* **2006**, 17 (8), 423–437.
- 427 <https://doi.org/10.1016/j.tifs.2006.02.004>.
- 428 (36) Mullin, G. E.; Belkoff, S. M. Survey to Determine Why People Drink Raw Milk. *Glob. Adv.*
- 429 *Health Med.* **2014**, 3 (6), 19–24. <https://doi.org/10.7453/gahmj.2014.041>.
- 430 (37) Heuvelink, A. E.; van Heerwaarden, C.; Zwartkruis-Nahuis, A.; Tilburg, J. J. H. C.; Bos, M.
- 431 H.; Heilmann, F. G. C.; Hofhuis, A.; Hoekstra, T.; de Boer, E. Two Outbreaks of
- 432 Campylobacteriosis Associated with the Consumption of Raw Cows' Milk. *Int. J. Food*
- 433 *Microbiol.* **2009**, 134 (1), 70–74. <https://doi.org/10.1016/j.ijfoodmicro.2008.12.026>.
- 434 (38) Guh, A.; Phan, Q.; Randall, N.; Purviance, K.; Milardo, E.; Kinney, S.; Mshar, P.; Kasacek,
- 435 W.; Cartter, M. Outbreak of Escherichia Coli O157 Associated with Raw Milk, Connecticut,
- 436 2008. *Clin. Infect. Dis.* **2010**, 51 (12), 1411–1417. <https://doi.org/10.1086/657304>.
- 437 (39) Ursini, T.; Moro, L.; Requena-Méndez, A.; Bertoli, G.; Buonfrate, D. A Review of Outbreaks
- 438 of Cryptosporidiosis Due to Unpasteurized Milk. *Infection* **2020**, 48 (5), 659–663.
- 439 <https://doi.org/10.1007/s15010-020-01426-3>.
- 440 (40) Ly, H. Highly Pathogenic Avian Influenza H5N1 Virus Infections of Dairy Cattle and
- 441 Livestock Handlers in the United States of America. *Virulence* **2024**, 15 (1), 2343931.
- 442 <https://doi.org/10.1080/21505594.2024.2343931>.
- 443 (41) Caserta, L. C.; Frye, E. A.; Butt, S. L.; Laverack, M.; Nooruzzaman, M.; Covalada, L. M.;
- 444 Thompson, A. C.; Koscielny, M. P.; Cronk, B.; Johnson, A.; Kleinhenz, K.; Edwards, E. E.;
- 445 Gomez, G.; Hitchener, G.; Martins, M.; Kapczynski, D. R.; Suarez, D. L.; Alexander Morris,

- 446 E. R.; Hensley, T.; Beeby, J. S.; Lejeune, M.; Swinford, A. K.; Elvinger, F.; Dimitrov, K. M.;  
447 Diel, D. G. Spillover of Highly Pathogenic Avian Influenza H5N1 Virus to Dairy Cattle.  
448 *Nature* **2024**, 1–8. <https://doi.org/10.1038/s41586-024-07849-4>.
- 449 (42) Eisfeld, A. J.; Biswas, A.; Guan, L.; Gu, C.; Maemura, T.; Trifkovic, S.; Wang, T.; Babujee,  
450 L.; Dahn, R.; Halfmann, P. J.; Barnhardt, T.; Neumann, G.; Suzuki, Y.; Thompson, A.;  
451 Swinford, A. K.; Dimitrov, K. M.; Poulsen, K.; Kawaoka, Y. Pathogenicity and  
452 Transmissibility of Bovine H5N1 Influenza Virus. *Nature* **2024**, 633 (8029), 426–432.  
453 <https://doi.org/10.1038/s41586-024-07766-6>.
- 454 (43) Burrough, E. R.; Magstadt, D. R.; Petersen, B.; Timmermans, S. J.; Gauger, P. C.; Zhang,  
455 J.; Siepker, C.; Mainenti, M.; Li, G.; Thompson, A. C.; Gorden, P. J.; Plummer, P. J.; Main,  
456 R. Highly Pathogenic Avian Influenza A(H5N1) Clade 2.3.4.4b Virus Infection in Domestic  
457 Dairy Cattle and Cats, United States, 2024 - Volume 30, Number 7—July 2024 - Emerging  
458 Infectious Diseases Journal - CDC. <https://doi.org/10.3201/eid3007.240508>.
- 459 (44) Li, Y.; Weng, P.; Wu, Z.; Liu, Y. Extending the Shelf Life of Raw Milk and Pasteurized Milk  
460 with Plantaricin FB-2. *Foods* **2023**, 12 (3), 608. <https://doi.org/10.3390/foods12030608>.
- 461 (45) Atyeo, C.; Alter, G. The Multifaceted Roles of Breast Milk Antibodies. *Cell* **2021**, 184 (6),  
462 1486–1499. <https://doi.org/10.1016/j.cell.2021.02.031>.
- 463 (46) Zambrana, W.; Boehm, A. B. Occurrence of Human Viruses on Fomites in the  
464 Environment: A Systematic Review and Meta-Analysis. *ACS Environ. Au* **2023**, 3 (5), 277.  
465 <https://doi.org/10.1021/acsenvironau.3c00025>.
- 466 (47) Buzby, J. C.; Hyman, J. Total and per Capita Value of Food Loss in the United States.  
467 *Food Policy* **2012**, 37 (5), 561–570. <https://doi.org/10.1016/j.foodpol.2012.06.002>.
- 468 (48) Giménez-Lirola, L. G.; Cauwels, B.; Mora-Díaz, J. C.; Magtoto, R.; Hernández, J.; Cordero-  
469 Ortiz, M.; Nelli, R. K.; Gorden, P. J.; Magstadt, D. R.; Baum, D. H. Detection and  
470 Monitoring of Highly Pathogenic Influenza A Virus 2.3.4.4b Outbreak in Dairy Cattle in the  
471 United States. *Viruses* **2024**, 16 (9), 1376. <https://doi.org/10.3390/v16091376>.
